# Supplementary material for: Loss of adipose triglyceride lipase is associated with human cancer and induces mouse pulmonary neoplasia
Source: PubMed Central journal article supplement (PMC5085122; doi:10.18632/oncotarget.9418), 2016-05-17
Supplement: oncotarget-07-33832-s001.pdf [file oncotarget-07-33832-s001.pdf]

# **Loss of adipose triglyceride lipase is associated with human cancer and induces mouse pulmonary neoplasia**

## **Supplementary Material**

**This file includes:**

- **Supplementary Figures 1- 6**
- **Supplementary Table**

**A**

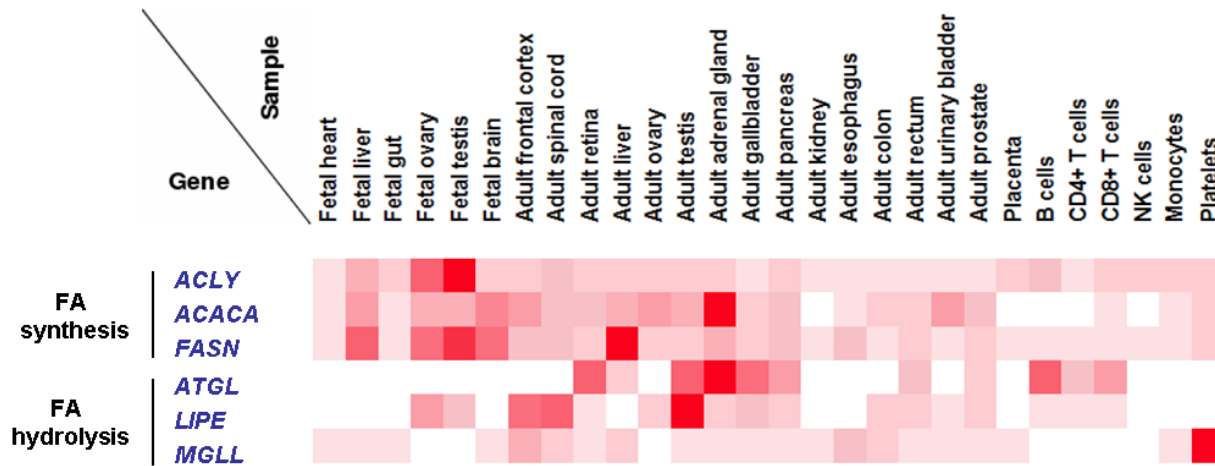

**B**

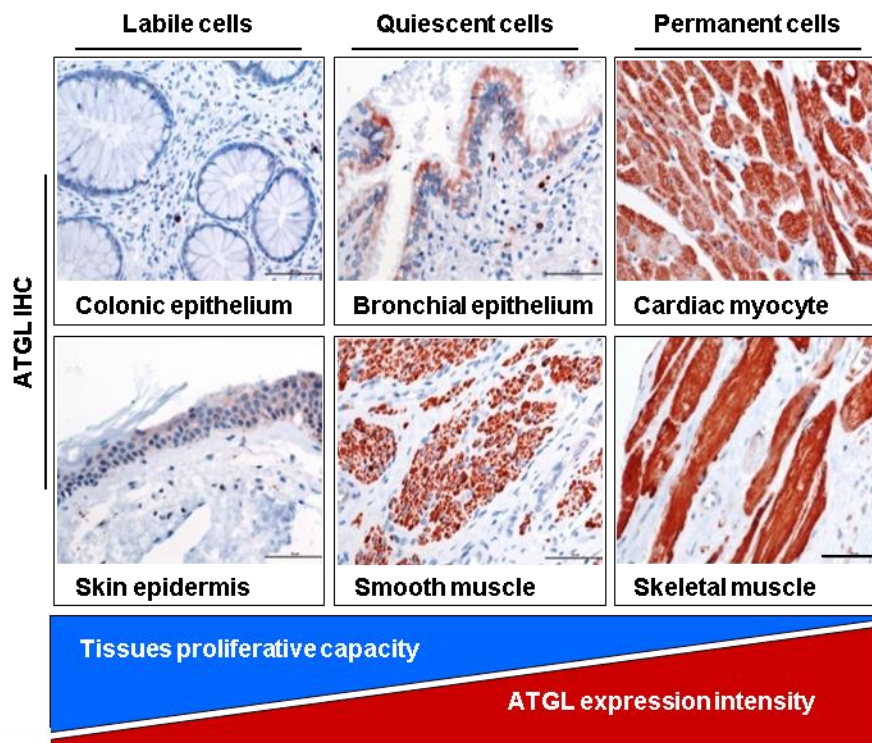

**Supplementary Figure 1. ATGL protein expression.** **A.** Heat map of protein abundance in fetal and adult tissues. FA, fatty acids; *ACLY*, ATP citrate lyase; *ACACA*, acetyl-CoA carboxylase alpha; *FASN*, fatty acid synthase; *ATGL*, adipose triglyceride lipase (the full name is patatin-like phospholipase domain containing 2, *PNPLA2*); *LIPE*, lipase hormone-sensitive (also known as *HSL*); *MGLL*, monoglyceride lipase (also known as *MGL*). **B.** ATGL protein expression across normal tissues. Scale bar, 50µm.

**A**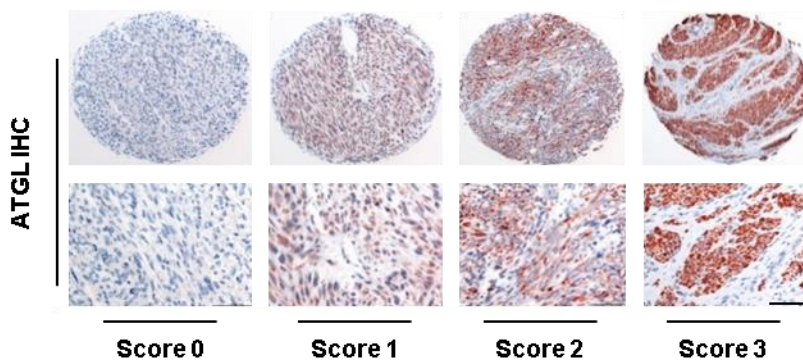**B**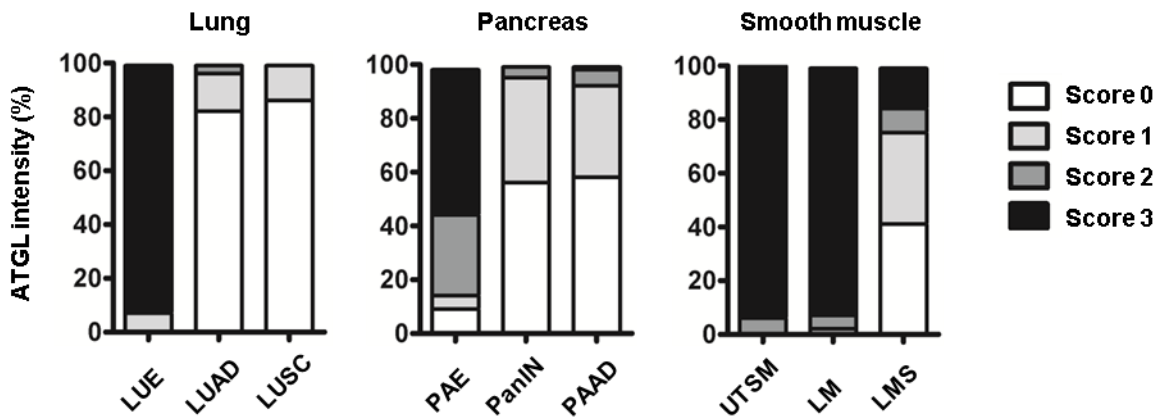

**Supplementary Figure 2. ATGL protein is frequently suppressed in human cancer. A.** Images illustrating ATGL IHC staining intensity score. Regions from the upper panels are shown in higher magnification in the lower panels. Scale bar, 50µm. **B.** Bar graphs show percentages of ATGL IHC staining intensity in neoplasia of lung epithelium, pancreatic epithelium or smooth muscle (see Fig. 1). LUE, normal lung epithelium; LUAD, lung adenocarcinoma; LUSC, lung squamous cell carcinoma; PAE, normal pancreatic epithelium; PanIN, pancreatic intraepithelial neoplasia; PAAD, pancreatic adenocarcinoma; UTSM, normal uterus smooth muscle; LM, benign smooth muscle tumor (leiomyoma); LMS, malignant smooth muscle tumor (leiomyosarcoma).

**A**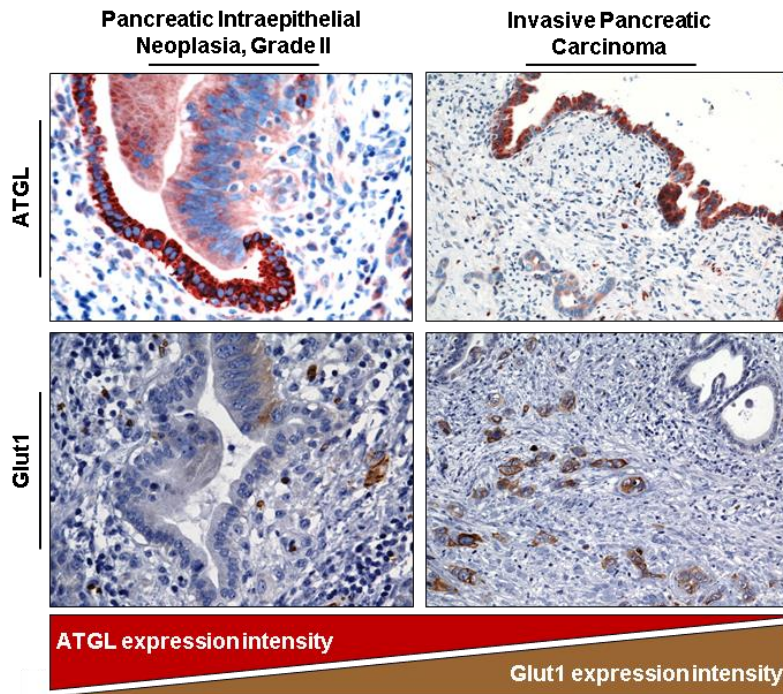**B**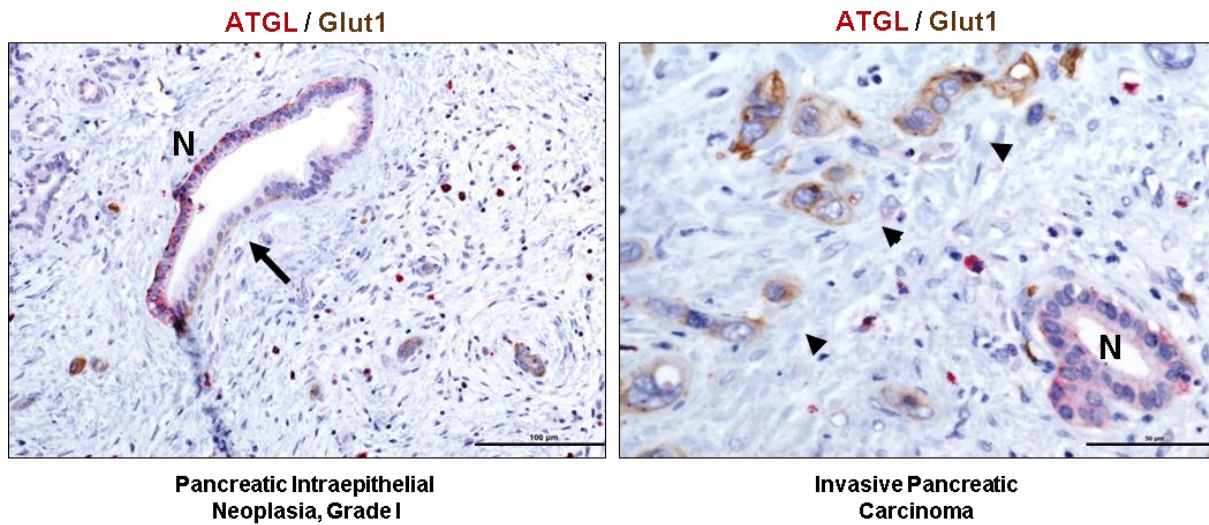

**Supplementary Figure 3. Inverse correlation between ATGL and glucose transporter 1 (Glut1).** **A.** Immunohistochemical (IHC) staining for ATGL (upper panels), or Glut1 (lower panels). **B.** Double IHC staining for ATGL (signal in red) and Glut1 (signal in brown). N, normal epithelium; arrow points to a neoplastic lesion shows detectable Glut1 signal at the basal domain; arrowheads point to invasive tumor cells. Scale bars, 100 μm (left panel) and 50 μm (right panel).

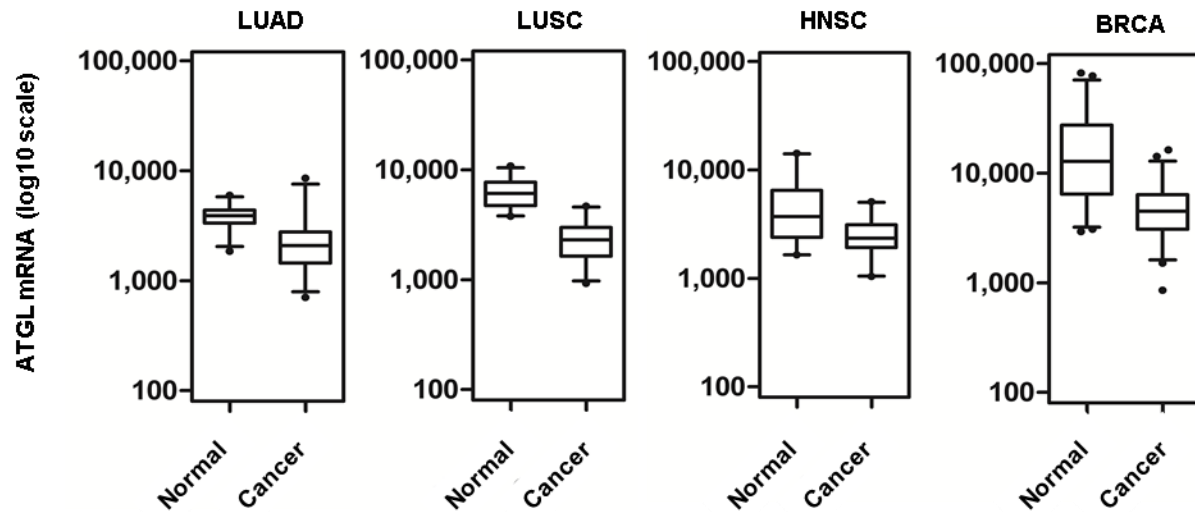

**Supplementary Figure 4. ATGL mRNA expression levels in samples of four types of cancer patients.** LUAD, lung adenocarcinoma; LUSC, lung squamous cell carcinoma; HNSC, head and neck squamous cell carcinoma; BRCA, breast ductal carcinoma. (LUAD:  $n = 57$ , Log2fold change = -0.85, Adjusted  $P$  value =  $1.47 \times 10^{-17}$ ; LUSC:  $n = 50$ , Log2fold change = -1.41, Adjusted  $P$  value =  $6.23 \times 10^{-50}$ ; HNSC:  $n = 40$ , Log2fold change = -0.72, Adjusted  $P$  value =  $1.57 \times 10^{-7}$ ; BRCA:  $n = 108$ , Log2fold change = -1.61, Adjusted  $P$  value =  $6.17 \times 10^{-33}$ .)

**A**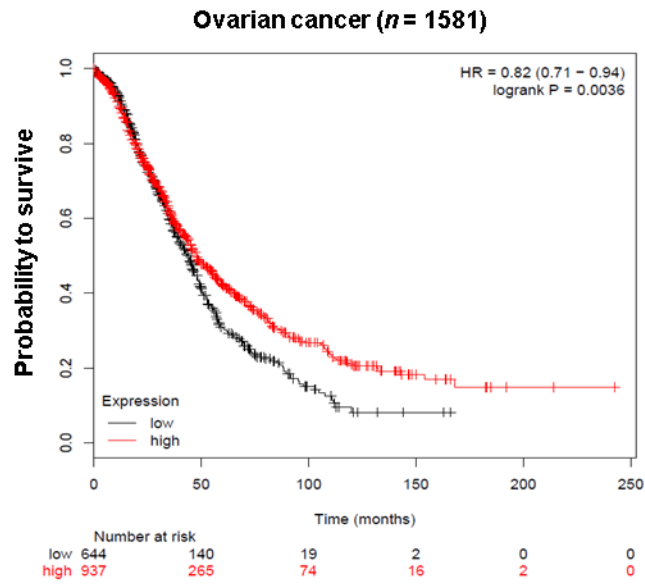**B**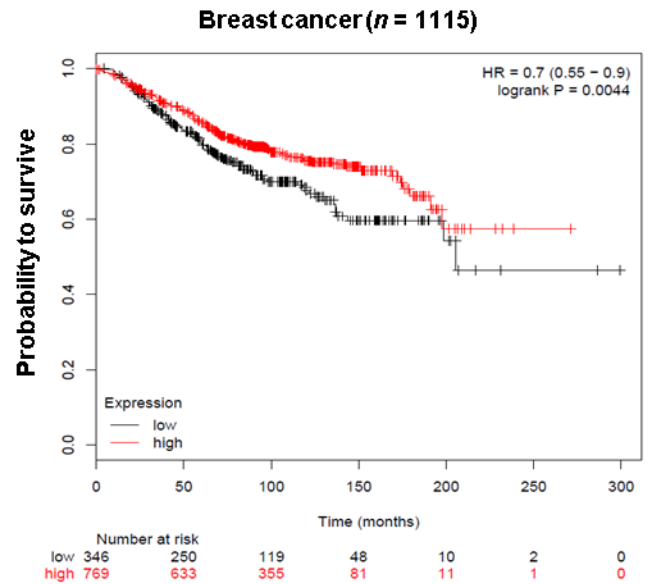**C**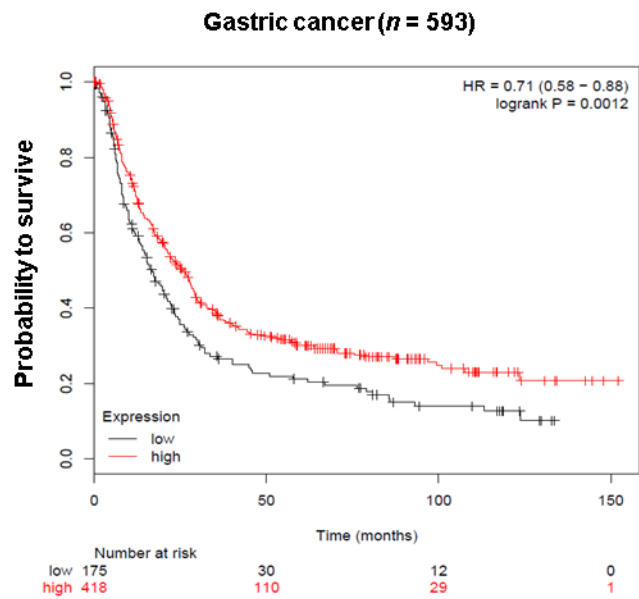**D**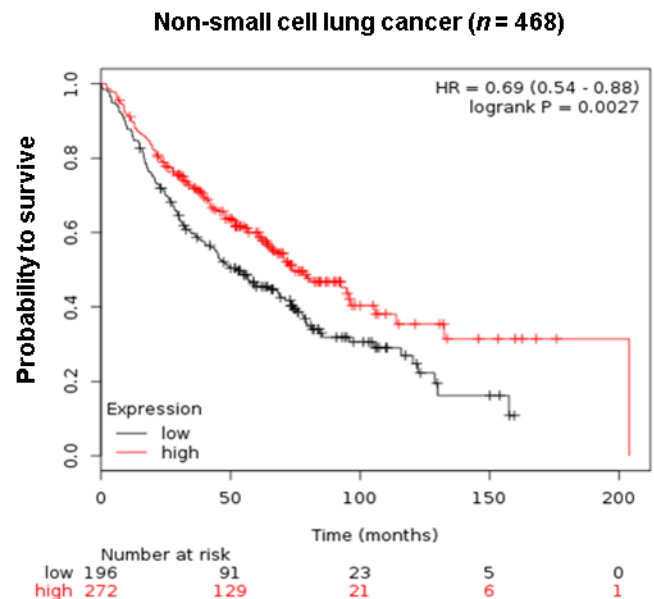

**Supplementary Figure 5. *ATGL* mRNA expression level is a prognostic factor in multiple cohorts of different types of cancer.** Overall survival of 1581 ovarian cancer patients (A), 1115 breast cancer patients (B), 593 gastric cancer patients (C), 486 non-small cell lung cancer patients (CAARRAY cohort) (D) after dichotomization according to the *ATGL* expression levels. HR: hazard ratio.

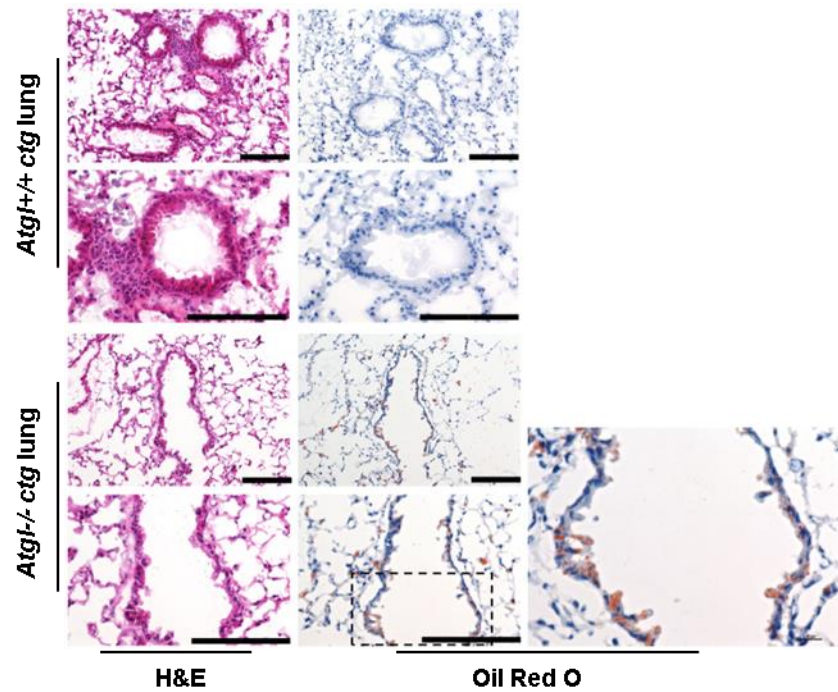

**Supplementary Figure 6. Accumulation of neutral lipids in ATGL deficient bronchial epithelial cells.** Representative images show H&E and Oil Red O staining of lung sections. Bronchial epithelium of *Atgl*<sup>-/-</sup> ctg mice stains positive for Oil Red O whereas bronchial epithelium of *Atgl*<sup>+/+</sup> ctg mice is negative. Regions from the upper panels are shown in higher magnification in the lower panels. Scale bar, 100µm.

**Supplementary Table: Number of animals with neoplastic lesions detected in lungs of *Atgl*+/+ ctg, *Atgl* +/- ctg and *Atgl* -/- ctg mice**

| Age group (months) | Number of animals with pulmonary neoplasia<br>Neoplasia/Total <sup>(Statistical significance)</sup> |                      |                         |
|--------------------|-----------------------------------------------------------------------------------------------------|----------------------|-------------------------|
|                    | <i>Atgl</i> +/+ ctg                                                                                 | <i>Atgl</i> +/- ctg  | <i>Atgl</i> -/- ctg     |
| 1-3                | 0/8                                                                                                 | 0/13 <sup>(ns)</sup> | 2/13 <sup>(ns)</sup>    |
| 4-6                | 0/10                                                                                                | 1/10 <sup>(ns)</sup> | 8/11 <sup>(***)</sup>   |
| 7-10               | 0/10                                                                                                | 0/5 <sup>(ns)</sup>  | 5/5 <sup>(***)</sup>    |
| 11-18              | 1/11                                                                                                | 4/12 <sup>(ns)</sup> | 12/12 <sup>(****)</sup> |
| 19-30              | 1/11                                                                                                | 4/9 <sup>(ns)</sup>  | 8/8 <sup>(****)</sup>   |

<sup>a</sup> Symbol meanings: <sup>ns</sup>  $P > .05$ ; <sup>\*\*\*</sup>  $P \leq .001$ ; <sup>\*\*\*\*</sup>  $P \leq .0001$

<sup>b</sup> Frequency of neoplasia in *Atgl*+/- ctg or *Atgl*-/- ctg mice is compared to frequency of neoplasia in *Atgl*+/+ ctg mice
